# Supplementary material for: Sea Urchin-Like MnO2/Biomass Carbon Composite Electrode Material for High-Performance Supercapacitors
Source: Hindawi journal article supplement (doi:10.1155/2024/2779104), 2024-02-27
Supplement: f1 [file 2779104.f1.doc]

Supplementary information

Sea urchin-like MnO2/biomass carbon composite electrode material for high performance supercapacitors

Xiaoyu Zhao,a‡ Ning Wang,b‡ Lei Li,b Zixun Fang,b Shoufeng Tang,b,* Jianmin Gub,*

aDepartment of Food and Pharmaceutical Engineering, Suihua University, Suihua 152000, P. R. China

bState Key Laboratory of Metastable Materials Science and Technology (MMST), Hebei Key Laboratory of Applied Chemistry, Yanshan University, Qinhuangdao 066004, P. R. China. E-mail: [tangshf@ysu.edu.cn](mailto:tangshf@ysu.edu.cn); [jmgu@ysu.edu.cn](mailto:jmgu@ysu.edu.cn)

‡Xiaoyu Zhao and Ning Wang contribute equally to this work.

**Contents**

1. **Figure S1.** EDS mapping of MnO2/BC (a) and MnO2 (b) material.
2. **Figure S2.** Typical N2 sorption-desorption isotherms (a) pure MnO2 and (b) MnO2/BC composites.
3. **Figure S3.** Values of b (slope) at different peak currents after linear fitting.
4. **Figure S4.** XRD of synthetic biomass carbon BC (a); Raman Spectra of Synthetic MnO2/BC (b).
5. **Figure S5.** Full cell constructed from MnO2/BC (a) and full cell constructed from pure MnO2 (b).
6. **Figure S6.** The charge and discharge curve of the whole cell constructed by the composite material.
7. **Figure S7.** Cyclic voltammetry curves at different sweep speeds when two capacitors are connected in series (a); Charge-discharge diagram (b).
8. **Figure S8.** Before the electrochromic device is lit by two capacitors in series (a); When light (b).
9. **Table S1.** Specific surface area versus pore volume of the synthetic material.
10. **Table S2.** Equivalent circuit diagrams for MnO2 and MnO2/BC nanocomposites correspond to resistance values.
11. **Table S3.** Summary of cycling stability of recently reported electrode material.

**Figure S1.** EDS mapping of MnO2/BC (a) and MnO2 (b) material.

**Figure S2.** Typical N2 sorption-desorption isotherms (a) pure MnO2 and (b) MnO2/BC composites.

**Figure S3.** Values of b (slope) at different peak currents after linear fitting.

**Figure S4.** XRD of synthetic biomass carbon BC (a); Raman Spectra of Synthetic MnO2/BC (b).

**Figure S5.** Full cell constructed from MnO2/BC (a) and full cell constructed from pure MnO2 (b).

**Figure S6.** The charge and discharge curve of the whole cell constructed by the composite material.

**Figure S7.** Cyclic voltammetry curves at different sweep speeds when two capacitors are connected in series (a); Charge-discharge diagram (b).

**Figure S8.** Before the electrochromic device is lit by two capacitors in series (a); When light (b).

**Table S1.** Specific surface area versus pore volume of the synthetic material.

| Sample | Specific surface area (m2g-1) | Pore volume |
| --- | --- | --- |
| MnO2 | 77.30  139.291 | 0.20 |
| MnO2/BC | 0.22 |

**Table S2.** Equivalent circuit diagrams for MnO2 and MnO2/BC nanocomposites correspond to resistance values.

| Sample | MnO2 | | | | MnO2/BC | |
| --- | --- | --- | --- | --- | --- | --- |
| R(ohm) | | Rs(ohm) | Rct(ohm) | Rs(ohm) | | Rct(ohm) |
| 2.58 | 45.30 | 2.23 | | 6.29 |

**Table S3.** Summary of cycling stability of recently reported electrode material.

| **electrode material** | **Cycling stability** | **Number of cycles** | **Reference** |
| --- | --- | --- | --- |
| ZnPCK-3 | 94.5% | 10,000 | *J. Energy Storage* **2023***, 67,* 107559 |
| ZnPCN-1 | 82% | 50,000 | *Int. J. Mol. Sci.* **2023***, 24,* 14156 |
| CPC-5 | 91.4% | 10,000 | *J. Colloid Interface Sci.* **2022***, 609,* 179–187 |
| NGHPC//NGHPC | 95.2% | 5,000 | *Chin. Chem. Lett.* **2020***, 31,* 1986–1990 |
| PCG-0.5 | 94% | 10,000 | *J. Colloid Interface Sci.* **2021***, 599,* 443–452 |
| ZnCl2 | 98.7% | 10,000 | *New J. Chem.* **2021***, 45,* 22602 |
| MnO2/BC | 105% | 4,000 | [This](#_ENREF_39) work |
